# Supplementary material for: Host Cell Factors in HIV Replication: Meta-Analysis of Genome-Wide Studies
Source: PLoS Pathog. 2009 May 29;5(5):e1000437. doi: 10.1371/journal.ppat.1000437 (PMC2682202; doi:10.1371/journal.ppat.1000437)
Supplement: Table S1 — Gene IDs from Functional Clusters in Figure 3 (0.09 MB XLS) [file ppat.1000437.s002.xls]

## Sheet: Bushman_et_al
GENE IDs
Konig_et_al	Brass_et_al	Zhou_et_al	Functional Bin	Category/Terms
5702			Proteosome Complex	GOTERM_CC_4	GOTERM_CC_5	SP_PIR_KEYWORDS	KEGG_PATHWAY	INTERPRO	INTERPRO	SP_PIR_KEYWORDS	GOTERM_CC_4	GOTERM_CC_5	GOTERM_MF_5	GOTERM_CC_5	GOTERM_CC_4
	5721		Proteosome Complex	GO:0000502~proteasome complex (sensu Eukaryota)	GO:0000502~proteasome complex (sensu Eukaryota)	proteasome	hsa03050:Proteasome	IPR000426:Proteasome alpha-subunit	IPR001353:20S proteasome, A and B subunits	Threonine protease	GO:0005839~proteasome core complex (sensu Eukaryota)	GO:0005839~proteasome core complex (sensu Eukaryota)	GO:0004298~threonine endopeptidase activity	GO:0005829~cytosol	GO:0005829~cytosol
5686			Proteosome Complex
5684			Proteosome Complex
5682			Proteosome Complex
5704			Proteosome Complex
9861			Proteosome Complex
		5710	Proteosome Complex
5694			Proteosome Complex
5718			Proteosome Complex
5688			Proteosome Complex
5705			Proteosome Complex
5683			Proteosome Complex
		54205	Proteosome Complex
	8517		Proteosome Complex
5213			Proteosome Complex
		58488	Proteosome Complex
2356			Proteosome Complex
		10576	Proteosome Complex
5211			Proteosome Complex
		475	Proteosome Complex
6141			Proteosome Complex
	1207		Proteosome Complex
	56650		Proteosome Complex
3417	3417		Proteosome Complex
		5269	Proteosome Complex
	858	858	Proteosome Complex
		10043	Proteosome Complex
		8996	Proteosome Complex
		1036	Proteosome Complex
	375		Proteosome Complex
		5232	Proteosome Complex
		5105	Proteosome Complex
331			Proteosome Complex
6136			Proteosome Complex
		27183	Proteosome Complex
	56893		Proteosome Complex
22938			RNA Splicing	GOTERM_BP_4	GOTERM_BP_4	GOTERM_BP_5	GOTERM_BP_5	GOTERM_MF_4	GOTERM_BP_4	GOTERM_BP_5
58517			RNA Splicing	GO:0000375~RNA splicing, via transesterification reactions	GO:0000398~nuclear mRNA splicing, via spliceosome	GO:0000377~RNA splicing, via transesterification reactions with bulged adenosine as nucleophile	GO:0000245~spliceosome assembly	GO:0031202~RNA splicing factor activity, transesterification mechanism	GO:0022618~protein-RNA complex assembly	GO:0022618~protein-RNA complex assembly
10569			RNA Splicing
6431			RNA Splicing
10594			RNA Splicing
	8487		RNA Splicing
6627			RNA Splicing
		10713	RNA Splicing
9416			RNA Splicing
10291			RNA Splicing
6626			RNA Splicing
24148			RNA Splicing
23451			RNA Splicing
10992			RNA Splicing
	8667		RNA Splicing
8893			RNA Splicing
		51605	RNA Splicing
	11128		RNA Polymerase/Transcription	GOTERM_MF_5	SP_PIR_KEYWORDS	KEGG_PATHWAY	GOTERM_CC_4	GOTERM_CC_5	GOTERM_CC_5	GOTERM_CC_4	GOTERM_CC_5	GOTERM_CC_4	GOTERM_CC_5	GOTERM_MF_4	KEGG_PATHWAY	GOTERM_CC_5	SP_PIR_KEYWORDS	KEGG_PATHWAY
9150	9150		RNA Polymerase/Transcription	GO:0003899~DNA-directed RNA polymerase activity	dna-directed rna polymerase	hsa03020:RNA polymerase	GO:0000428~DNA-directed RNA polymerase complex	GO:0000428~DNA-directed RNA polymerase complex	GO:0055029~nuclear DNA-directed RNA polymerase complex	GO:0030880~RNA polymerase complex	GO:0030880~RNA polymerase complex	GO:0005665~DNA-directed RNA polymerase II, core complex	GO:0005665~DNA-directed RNA polymerase II, core complex	GO:0016779~nucleotidyltransferase activity	hsa00240:Pyrimidine metabolism	GO:0005666~DNA-directed RNA polymerase III complex	Nucleotidyltransferase	hsa00230:Purine metabolism
		5440	RNA Polymerase/Transcription
5438			RNA Polymerase/Transcription
		9477	RNA Polymerase/Transcription
	30834		RNA Polymerase/Transcription
	10621		RNA Polymerase/Transcription
		5437	RNA Polymerase/Transcription
5439			RNA Polymerase/Transcription
64425			RNA Polymerase/Transcription
5432			RNA Polymerase/Transcription
		5441	RNA Polymerase/Transcription
7707			RNA Polymerase/Transcription
80347			RNA Polymerase/Transcription
		6675	RNA Polymerase/Transcription
		124751	RNA Polymerase/Transcription
10728			RNA Polymerase/Transcription
790			RNA Polymerase/Transcription
124583			RNA Polymerase/Transcription
7372			RNA Polymerase/Transcription
		5151	RNA Polymerase/Transcription
		5313	RNA Polymerase/Transcription
6634			Splicing/snRNP	GOTERM_CC_4	GOTERM_CC_5	GOTERM_CC_4	GOTERM_CC_5	BIOCARTA
10569			Splicing/snRNP	GO:0030532~small nuclear ribonucleoprotein complex	GO:0030532~small nuclear ribonucleoprotein complex	GO:0005684~U2-dependent spliceosome	GO:0005684~U2-dependent spliceosome	h_smPathway:Spliceosomal Assembly
10594			Splicing/snRNP
6631			Splicing/snRNP
6627			Splicing/snRNP
6626			Splicing/snRNP
9416			Splicing/snRNP
		6427	Splicing/snRNP
	29079	29079	Mediator Complex/Transcription	GOTERM_CC_4	GOTERM_CC_5	GOTERM_BP_5	GOTERM_MF_5	GOTERM_BP_4	GOTERM_BP_5	GOTERM_MF_4	GOTERM_MF_4	GOTERM_BP_5	GOTERM_BP_4	GOTERM_MF_4	GOTERM_BP_5	GOTERM_MF_5	GOTERM_MF_4
		112950	Mediator Complex/Transcription	GO:0000119~mediator complex	GO:0000119~mediator complex	GO:0006367~transcription initiation from RNA polymerase II promoter	GO:0003713~transcription coactivator activity	GO:0006352~transcription initiation	GO:0006352~transcription initiation	GO:0016455~RNA polymerase II transcription mediator activity	GO:0051427~hormone receptor binding	GO:0030522~intracellular receptor-mediated signaling pathway	GO:0065004~protein-DNA complex assembly	GO:0046966~thyroid hormone receptor binding	GO:0065004~protein-DNA complex assembly	GO:0035257~nuclear hormone receptor binding	GO:0042809~vitamin D receptor binding
		9441	Mediator Complex/Transcription
		400569	Mediator Complex/Transcription
9282	9282		Mediator Complex/Transcription
		51003	Mediator Complex/Transcription
		9440	Mediator Complex/Transcription
10001	10001	10001	Mediator Complex/Transcription
		9442	Mediator Complex/Transcription
9443	9443	9443	Mediator Complex/Transcription
23054			Mediator Complex/Transcription
		387332	Mediator Complex/Transcription
		2957	Mediator Complex/Transcription
57658			Mediator Complex/Transcription
22938			Mediator Complex/Transcription
5702			Mediator Complex/Transcription
2034			Mediator Complex/Transcription
	7023		Mediator Complex/Transcription
6942			Mediator Complex/Transcription
		672	Mediator Complex/Transcription
24148			Mediator Complex/Transcription
	2648		Mediator Complex/Transcription
10923			Mediator Complex/Transcription
2033			Mediator Complex/Transcription
50804			Mediator Complex/Transcription
2966			Mediator Complex/Transcription
23636			Mediator Complex/Transcription
5705			Mediator Complex/Transcription
		51366	Mediator Complex/Transcription
8289			Mediator Complex/Transcription
7994			Mediator Complex/Transcription
10036			Mediator Complex/Transcription
3146			Mediator Complex/Transcription
	3020		Mediator Complex/Transcription
84991			RNA Binding	SP_PIR_KEYWORDS	INTERPRO	UP_SEQ_FEATURE	UP_SEQ_FEATURE	INTERPRO	UP_SEQ_FEATURE	SMART
	168400		RNA Binding	rna-binding	IPR012677:Nucleotide-binding, alpha-beta plait	domain:RRM 1	domain:RRM 2	IPR000504:RNA recognition motif, RNP-1	domain:RRM 3	SM00360:RRM
	56915		RNA Binding
8241			RNA Binding
		7514	RNA Binding
10657			RNA Binding
		65109	RNA Binding
		6041	RNA Binding
10181			RNA Binding
		9904	RNA Binding
	27258		RNA Binding
9716			RNA Binding
10921			RNA Binding
5394			RNA Binding
9987			RNA Binding
		79009	RNA Binding
4904			RNA Binding
	1662		RNA Binding
10179			RNA Binding
10482			RNA Binding
8087			RNA Binding
	1654	1654	RNA Binding
3187			RNA Binding
	3185		RNA Binding
6431			RNA Binding
	6741		RNA Binding
10594			RNA Binding
6627			RNA Binding
6631			RNA Binding
167227			RNA Binding
58506			RNA Binding
	57696		RNA Binding
23013			RNA Binding
		6427	RNA Binding
		3192	RNA Binding
6626			RNA Binding
		65080	RNA Binding
	51010		RNA Binding
	57187		RNA Binding
50804			RNA Binding
6136			RNA Binding
58517			RNA Binding
		6150	RNA Binding
	27336		RNA Binding
			RNA Binding
	5870		ER/Golgi Transport	GOTERM_BP_4	GOTERM_BP_5	SP_PIR_KEYWORDS	GOTERM_BP_4	GOTERM_BP_4	GOTERM_BP_4	GOTERM_BP_5	GOTERM_BP_5	GOTERM_BP_5	GOTERM_BP_4
	5862		ER/Golgi Transport	GO:0006888~ER to Golgi vesicle-mediated transport	GO:0006888~ER to Golgi vesicle-mediated transport	er-golgi transport	GO:0032940~secretion by cell	GO:0048193~Golgi vesicle transport	GO:0045045~secretory pathway	GO:0048193~Golgi vesicle transport	GO:0032940~secretion by cell	GO:0045045~secretory pathway	GO:0016192~vesicle-mediated transport
55850			ER/Golgi Transport
	375		ER/Golgi Transport
		29959	ER/Golgi Transport
	22878		ER/Golgi Transport
	83548		ER/Golgi Transport
	23256		ER/Golgi Transport
	58485		ER/Golgi Transport
	9570		ER/Golgi Transport
	51560		ER/Golgi Transport
	10959		ER/Golgi Transport
10313			ER/Golgi Transport
22938			ER/Golgi Transport
	3937		ER/Golgi Transport
	10244		ER/Golgi Transport
	1950		ER/Golgi Transport
63941			ER/Golgi Transport
		51192	ER/Golgi Transport
55327			ER/Golgi Transport
		55503	ER/Golgi Transport
6812			ER/Golgi Transport
	22796		ER/Golgi Transport
1139			ER/Golgi Transport
	140730		ER/Golgi Transport
	114780		ER/Golgi Transport
23166			ER/Golgi Transport
	9146		ER/Golgi Transport
1785			ER/Golgi Transport
	1201		ER/Golgi Transport
		10043	ER/Golgi Transport
1211			ER/Golgi Transport
	1173		ER/Golgi Transport
8906			ER/Golgi Transport
	6811		ER/Golgi Transport
		27183	ER/Golgi Transport
		5886	DNA Binding	GOTERM_MF_5	GOTERM_MF_4	GOTERM_MF_5
2067			DNA Binding	GO:0003697~single-stranded DNA binding	GO:0043566~structure-specific DNA binding	GO:0003690~double-stranded DNA binding
9987			DNA Binding
4904			DNA Binding
	5813		DNA Binding
2073			DNA Binding
		7014	DNA Binding
10923			DNA Binding
	3508		DNA Binding
4361		4361	DNA Binding
	1956		DNA Binding
		5379	DNA Binding
5702			AAA ATPase/Proteosome	INTERPRO	INTERPRO	INTERPRO	PIR_SUPERFAMILY	INTERPRO	SMART
5704			AAA ATPase/Proteosome	IPR003960:AAA ATPase, subdomain	IPR003959:AAA ATPase, core	IPR003593:AAA+ ATPase, core	PIRSF001171:ATP-dependent 26S proteinase	IPR005937:26S proteasome subunit P45	SM00382:AAA
	6683		AAA ATPase/Proteosome
10939			AAA ATPase/Proteosome
79781			AAA ATPase/Proteosome
		27183	AAA ATPase/Proteosome
5705			AAA ATPase/Proteosome
6687			AAA ATPase/Proteosome
		506	AAA ATPase/Proteosome
	27433		AAA ATPase/Proteosome
1665			AAA ATPase/Proteosome
	3508		AAA ATPase/Proteosome
	23195		AAA ATPase/Proteosome
7320			Ubiquitin-associated	INTERPRO	UP_SEQ_FEATURE	GOTERM_MF_4	SMART	SP_PIR_KEYWORDS	GOTERM_MF_5	KEGG_PATHWAY	PIR_SUPERFAMILY	SP_PIR_KEYWORDS
		65264	Ubiquitin-associated	IPR000608:Ubiquitin-conjugating enzyme, E2	active site:Glycyl thioester intermediate	GO:0016881~acid-amino acid ligase activity	SM00212:UBCc	Ubl conjugation pathway	GO:0019787~small conjugating protein ligase activity	hsa04120:Ubiquitin mediated proteolysis	PIRSF001567:ubiquitin-protein ligase E2	ligase
		7251	Ubiquitin-associated
7332			Ubiquitin-associated
7328			Ubiquitin-associated
84914			Ubiquitin-associated
11065			Ubiquitin-associated
		7324	Ubiquitin-associated
		51366	Ubiquitin-associated
	10075		Ubiquitin-associated
4734			Ubiquitin-associated
29882		29882	Ubiquitin-associated
2356			Ubiquitin-associated
	23014		Ubiquitin-associated
164714			Ubiquitin-associated
		672	Ubiquitin-associated
	23291		Ubiquitin-associated
6613			Ubiquitin-associated
		205564	Ubiquitin-associated
		6048	Ubiquitin-associated
	9098		Ubiquitin-associated
8507			Ubiquitin-associated
		112950	Ubiquitin-associated
	9140		Ubiquitin-associated
	84893		Ubiquitin-associated
	83844		Ubiquitin-associated
	10533		Ubiquitin-associated
6921			Ubiquitin-associated
		142689	Ubiquitin-associated
5903	5903		Ubiquitin-associated
54476			Ubiquitin-associated
	9730		Ubiquitin-associated
331			Ubiquitin-associated
790			Ubiquitin-associated
		28965	Ubiquitin-associated
3735			Ubiquitin-associated
		8801	Ubiquitin-associated
		32	Ubiquitin-associated
	51520		Ubiquitin-associated
			Ubiquitin-associated
4361		4361	DNA Repair	SP_PIR_KEYWORDS	SP_PIR_KEYWORDS	GOTERM_BP_4	GOTERM_BP_5	GOTERM_BP_4	GOTERM_BP_5
7320			DNA Repair	DNA damage	DNA repair	GO:0006281~DNA repair	GO:0006281~DNA repair	GO:0006259~DNA metabolic process	GO:0006310~DNA recombination
		2965	DNA Repair
80198			DNA Repair
10036			DNA Repair
		5886	DNA Repair
2067			DNA Repair
2966			DNA Repair
221120			DNA Repair
2073			DNA Repair
	2071		DNA Repair
		672	DNA Repair
		11011	DNA Repair
5885			DNA Repair
		55247	DNA Repair
56949			DNA Repair
		5379	DNA Repair
23054			DNA Repair
7832			DNA Repair
3146			DNA Repair
	84893		DNA Repair
	3508		DNA Repair
		54205	DNA Repair
7994			DNA Repair
		124751	DNA Repair
	55693		DNA Repair
	3020		DNA Repair
8940			DNA Repair
	2648		DNA Repair
54815			DNA Repair
	10075		DNA Repair
	5813		DNA Repair
8289			DNA Repair
29803			DNA Repair
	7029		DNA Repair
		7014	DNA Repair
	1950		DNA Repair
		8839	DNA Repair
3065			DNA Repair
	4771		DNA Repair
10728			DNA Repair
4928			DNA Repair
	51111		DNA Repair
2033			DNA Repair
	23279		RNA export	GOTERM_BP_4	GOTERM_BP_5	GOTERM_BP_5
10657			RNA export	GO:0006405~RNA export from nucleus	GO:0006405~RNA export from nucleus	GO:0006406~mRNA export from nucleus
	57122		RNA export
	55746		RNA export
10482			RNA export
		11163	RNA export
		7514	Protein Complex Assembly	Category	GOTERM_BP_4	GOTERM_BP_4	GOTERM_BP_5
		81846	Protein Complex Assembly	Term	GO:0065003~macromolecular complex assembly	GO:0006461~protein complex assembly	GO:0006461~protein complex assembly
10569			Protein Complex Assembly
9282	9282		Protein Complex Assembly
	8487		Protein Complex Assembly
		10713	Protein Complex Assembly
9443	9443	9443	Protein Complex Assembly
8893			Protein Complex Assembly
9416			Protein Complex Assembly
7994			Protein Complex Assembly
10291			Protein Complex Assembly
23054			Protein Complex Assembly
	114780		Protein Complex Assembly
		387332	Protein Complex Assembly
	23195		Protein Complex Assembly
		2957	Protein Complex Assembly
		9442	Protein Complex Assembly
		374291	Protein Complex Assembly
	8667		Protein Complex Assembly
11076			Protein Complex Assembly
3146			Protein Complex Assembly
	222484		Protein Complex Assembly
4355			Protein Complex Assembly
		10157	Protein Complex Assembly
3837			Protein Complex Assembly
		9440	Protein Complex Assembly
	3020		Protein Complex Assembly
		23590	Protein Complex Assembly
6431			Protein Complex Assembly
	858	858	Protein Complex Assembly
		51605	Protein Complex Assembly
10036			Protein Complex Assembly
7450			Protein Complex Assembly
	29079	29079	Protein Complex Assembly
2966			Protein Complex Assembly
	1173		Protein Complex Assembly
1211			Protein Complex Assembly
		9441	Protein Complex Assembly
64901			Protein Complex Assembly
24148			Protein Complex Assembly
4928			Protein Complex Assembly
8906			Protein Complex Assembly
	79902		Outermembrane/pore	SP_PIR_KEYWORDS	GOTERM_MF_5	GOTERM_CC_4	GOTERM_CC_5
10762			Outermembrane/pore	porin	GO:0022829~wide pore channel activity	GO:0019867~outer membrane	GO:0019867~outer membrane
8021			Outermembrane/pore
9972	9972		Outermembrane/pore
4928			Outermembrane/pore
23636			Outermembrane/pore
	55746		Outermembrane/pore
	9868		Outermembrane/pore
25813			Outermembrane/pore
4361		4361	Exonuclease	SP_PIR_KEYWORDS	SP_PIR_KEYWORDS	GOTERM_MF_5	GOTERM_MF_4	SP_PIR_KEYWORDS	GOTERM_MF_5	GOTERM_MF_5
5394			Exonuclease	nuclease	Exonuclease	GO:0004527~exonuclease activity	GO:0004518~nuclease activity	Endonuclease	GO:0004536~deoxyribonuclease activity	GO:0004519~endonuclease activity
2067			Exonuclease
		81875	Exonuclease
	56915		Exonuclease
2073			Exonuclease
	112479		Exonuclease
79033			Exonuclease
80198			Exonuclease
		65080	Exonuclease
		6041	Exonuclease
	51010		Exonuclease
		10595	Exonuclease
		124751	Exonuclease
		55247	Exonuclease
	57696		Helicase	INTERPRO	SMART	SP_PIR_KEYWORDS	INTERPRO	INTERPRO	INTERPRO	INTERPRO	SMART	INTERPRO	UP_SEQ_FEATURE	UP_SEQ_FEATURE	UP_SEQ_FEATURE	PIR_SUPERFAMILY	UP_SEQ_FEATURE	KEGG_PATHWAY	KEGG_PATHWAY
		79009	Helicase	IPR014001:DEAD-like helicase, N-terminal	SM00487:DEXDc	helicase	IPR014021:Helicase, superfamily 1 and 2, ATP-binding	IPR011545:DNA/RNA helicase, DEAD/DEAH box type, N-terminal	IPR001650:DNA/RNA helicase, C-terminal	IPR014014:RNA helicase, DEAD-box type, Q motif	SM00490:HELICc	IPR000629:RNA helicase, ATP-dependent, DEAD-box type	short sequence motif:Q motif	domain:Helicase C-terminal	domain:Helicase ATP-binding	PIRSF001321:ATP-dependent RNA helicase	short sequence motif:DEAD box	hsa00790:Folate biosynthesis	hsa00500:Starch and sucrose metabolism
	168400		Helicase
	1654	1654	Helicase
	1662		Helicase
	2071		Helicase
1665			Helicase
		91351	Helicase
9416			Helicase
	64848		Helicase
	3508		Helicase
	56919		Helicase
9716			Helicase
	84893		Helicase
2356			Helicase
	2645		Helicase
5236			Helicase
54765			Zinc Finger, B-box	INTERPRO	UP_SEQ_FEATURE	UP_SEQ_FEATURE	SMART	UP_SEQ_FEATURE
		287015	Zinc Finger, B-box	IPR000315:Zinc finger, B-box	zinc finger region:B box-type 2	zinc finger region:B box-type 1	SM00336:BBOX	zinc finger region:B box-type
9866			Zinc Finger, B-box
84675	84675		Zinc Finger, B-box
81786			Zinc Finger, B-box
	25893		Zinc Finger, B-box
23650			Zinc Finger, B-box
81844			Zinc Finger, B-box
81603			Zinc Finger, B-box
8241			RanBP2-type Zn Finger	INTERPRO	SMART	UP_SEQ_FEATURE
9972	9972		RanBP2-type Zn Finger	IPR001876:Zinc finger, RanBP2-type	SM00547:ZnF_RBZ	zinc finger region:RanBP2-type
5903	5903		RanBP2-type Zn Finger
		55247	RanBP2-type Zn Finger
10181			RanBP2-type Zn Finger
	3797		GTP Binding	SP_PIR_KEYWORDS	SP_PIR_KEYWORDS	UP_SEQ_FEATURE	PIR_SUPERFAMILY	INTERPRO	INTERPRO	SP_PIR_KEYWORDS	INTERPRO	SP_PIR_KEYWORDS	INTERPRO	UP_SEQ_FEATURE	SP_PIR_KEYWORDS	PIR_SUPERFAMILY	BIOCARTA	UP_SEQ_FEATURE	SP_PIR_KEYWORDS	INTERPRO	GOTERM_MF_4	SMART	SP_PIR_KEYWORDS	GOTERM_MF_5	GOTERM_BP_5	SP_PIR_KEYWORDS	UP_SEQ_FEATURE
		506	GTP Binding	P-loop	nucleotide binding	short sequence motif:Effector region	PIRSF500590:Ras-related protein Rab6	IPR001806:Ras GTPase	IPR015600:Rab6-related	GTP binding	IPR013753:Ras	prenylated cysteine	IPR005225:Small GTP-binding protein domain	nucleotide phosphate-binding region:GTP	GTP-binding	PIRSF001710:Ras-related protein Rab	h_rabPathway:Rab GTPases Mark Targets In The Endocytotic Machinery	lipid moiety-binding region:S-geranylgeranyl cysteine	prenylation	IPR003579:Ras small GTPase, Rab type	GO:0019001~guanyl nucleotide binding	SM00175:RAB	membrane trafficking	GO:0032561~guanyl ribonucleotide binding	GO:0007264~small GTPase mediated signal transduction	lipoprotein	propeptide:Removed in mature form
5702			GTP Binding
	5908		GTP Binding
1665			GTP Binding
		5899	GTP Binding
		4218	GTP Binding
	5870		GTP Binding
	5862		GTP Binding
	375		GTP Binding
4542			GTP Binding
		3192	GTP Binding
		5105	GTP Binding
	9364	9364	GTP Binding
4144			GTP Binding
5705			GTP Binding
	84084		GTP Binding
		27289	GTP Binding
	81876		GTP Binding
		29984	GTP Binding
	51560		GTP Binding
	116986		GTP Binding
		132946	GTP Binding
		51807	GTP Binding
1785			GTP Binding
	23176		GTP Binding
	10325		GTP Binding
	79861		GTP Binding
		10294	GTP Binding
22938			GTP Binding
55619			GTP Binding
64901			GTP Binding
400723			GTP Binding
	26130		GTP Binding
23636			GTP Binding
	9098		GTP Binding
	23365		GTP Binding
		613	GTP Binding
	79774		GTP Binding
	2889		GTP Binding
	26230		GTP Binding
	55785		GTP Binding
	128272		GTP Binding
6239			GTP Binding
		83874	GTP Binding
11214			GTP Binding
		3552	GTP Binding
		2891	GTP Binding
		338	GTP Binding
	4713		GTP Binding
	920	920	GTP Binding
	8581		GTP Binding
	30818		GTP Binding
	2765		GTP Binding
	4023		GTP Binding
		9170	GTP Binding
	147719		GTP Binding
640			GTP Binding
	5902		GTP Binding (2)	INTERPRO	SMART	GOTERM_MF_4	GOTERM_MF_5
10762			GTP Binding (2)	IPR000156:Ran Binding Protein 1	SM00160:RanBD	GO:0051020~GTPase binding	GO:0031267~small GTPase binding
	84220		GTP Binding (2)
5903	5903		GTP Binding (2)
55619			GTP Binding (2)
	55785		GTP Binding (2)
		2965	Response to Light Stimulus	GOTERM_CC_4	GOTERM_BP_4	GOTERM_BP_5
2966			Response to Light Stimulus	GO:0005675~holo TFIIH complex	GO:0009416~response to light stimulus	GO:0009411~response to UV
2073			Response to Light Stimulus
	2071		Response to Light Stimulus
		94233	Response to Light Stimulus
9575			Response to Light Stimulus
4144			Response to Light Stimulus
5970	5970	5970	Response to Light Stimulus
		5886	Excision Repair	GOTERM_BP_5	GOTERM_BP_5	GOTERM_BP_4	GOTERM_BP_5
2067			Excision Repair	GO:0006289~nucleotide-excision repair	GO:0000737~DNA catabolic process, endonucleolytic	GO:0006308~DNA catabolic process	GO:0006308~DNA catabolic process
2073			Excision Repair
	2071		Excision Repair
		55247	Excision Repair
56949			Excision Repair
		54205	Excision Repair
	23279		Nuclear Pore/Import	SP_PIR_KEYWORDS	SP_PIR_KEYWORDS	SP_PIR_KEYWORDS	GOTERM_BP_4	GOTERM_BP_4	GOTERM_BP_4	GOTERM_BP_5	GOTERM_BP_5	GOTERM_CC_4	GOTERM_CC_5	GOTERM_BP_4	GOTERM_BP_4	GOTERM_BP_5	GOTERM_CC_5	GOTERM_BP_5	GOTERM_CC_4	GOTERM_CC_5	GOTERM_BP_4	GOTERM_BP_5	GOTERM_BP_5	GOTERM_CC_4	GOTERM_CC_5	GOTERM_BP_4	GOTERM_BP_5	SP_PIR_KEYWORDS	GOTERM_CC_4	GOTERM_CC_5	GOTERM_BP_5	GOTERM_CC_5	GOTERM_CC_4	GOTERM_BP_5	GOTERM_BP_4	GOTERM_BP_5	GOTERM_BP_5	INTERPRO	GOTERM_BP_5
10762			Nuclear Pore/Import	nuclear pore complex	mrna transport	translocation	GO:0050658~RNA transport	GO:0051236~establishment of RNA localization	GO:0050657~nucleic acid transport	GO:0050657~nucleic acid transport	GO:0050658~RNA transport	GO:0005643~nuclear pore	GO:0005643~nuclear pore	GO:0051028~mRNA transport	GO:0015931~nucleobase, nucleoside, nucleotide and nucleic acid transport	GO:0051028~mRNA transport	GO:0046930~pore complex	GO:0065002~intracellular protein transport across a membrane	GO:0044453~nuclear membrane part	GO:0044453~nuclear membrane part	GO:0051169~nuclear transport	GO:0051169~nuclear transport	GO:0006913~nucleocytoplasmic transport	GO:0031965~nuclear membrane	GO:0031965~nuclear membrane	GO:0006886~intracellular protein transport	GO:0006886~intracellular protein transport	porin	GO:0005635~nuclear envelope	GO:0005635~nuclear envelope	GO:0006605~protein targeting	GO:0031967~organelle envelope	GO:0031967~organelle envelope	GO:0006606~protein import into nucleus	GO:0017038~protein import	GO:0017038~protein import	GO:0000060~protein import into nucleus, translocation	IPR001494:Importin-beta, N-terminal	GO:0043623~cellular protein complex assembly
8021			Nuclear Pore/Import
9972	9972		Nuclear Pore/Import
64901			Nuclear Pore/Import
	57122		Nuclear Pore/Import
	84220		Nuclear Pore/Import
5903	5903		Nuclear Pore/Import
4928			Nuclear Pore/Import
	9631		Nuclear Pore/Import
23636			Nuclear Pore/Import
	55746		Nuclear Pore/Import
		7514	Nuclear Pore/Import
		65109	Nuclear Pore/Import
	57187		Nuclear Pore/Import
10482			Nuclear Pore/Import
10245			Nuclear Pore/Import
		23480	Nuclear Pore/Import
	1678		Nuclear Pore/Import
10657			Nuclear Pore/Import
		11163	Nuclear Pore/Import
	10075		Nuclear Pore/Import
3837			Nuclear Pore/Import
5664			Nuclear Pore/Import
	5449		Nuclear Pore/Import
		2923	Nuclear Pore/Import
		2147	Nuclear Pore/Import
	207	207	Nuclear Pore/Import
	102		Nuclear Pore/Import
80824			Nuclear Pore/Import
		7043	Nuclear Pore/Import
8407			Nuclear Pore/Import
26509			Nuclear Pore/Import
22938			Nuclear Pore/Import
		6745	Nuclear Pore/Import
	114780		Nuclear Pore/Import
	9570		Nuclear Pore/Import
	9146		Nuclear Pore/Import
	22796		Nuclear Pore/Import
		11337	Nuclear Pore/Import
		10043	Nuclear Pore/Import
	11345		Nuclear Pore/Import
	1173		Nuclear Pore/Import
1211			Nuclear Pore/Import
		6747	Nuclear Pore/Import
	83548		Nuclear Pore/Import
8906			Nuclear Pore/Import
	6811		Nuclear Pore/Import
	79902		Nuclear Pore/Import
		54205	Nuclear Pore/Import
		4705	Nuclear Pore/Import
6687			Nuclear Pore/Import
81855			Nuclear Pore/Import
125965			Nuclear Pore/Import
		4700	Nuclear Pore/Import
		374291	Nuclear Pore/Import
		7384	Nuclear Pore/Import
10939			Nuclear Pore/Import
		9481	Nuclear Pore/Import
		506	Nuclear Pore/Import
		10479	Nuclear Pore/Import
	9868		Nuclear Pore/Import
	4713		Nuclear Pore/Import
7386			Nuclear Pore/Import
25813			Nuclear Pore/Import
		4726	Nuclear Pore/Import
22938			Transcription	GOTERM_BP_4	GOTERM_MF_4	GOTERM_MF_5	GOTERM_BP_5
9282	9282		Transcription	GO:0006366~transcription from RNA polymerase II promoter	GO:0003712~transcription cofactor activity	GO:0003713~transcription coactivator activity	GO:0006357~regulation of transcription from RNA polymerase II promoter
9443	9443	9443	Transcription
23054			Transcription
		27063	Transcription
		2553	Transcription
		9442	Transcription
	6940		Transcription
4904			Transcription
		2122	Transcription
3146			Transcription
	2071		Transcription
	30818		Transcription
23650			Transcription
50674			Transcription
	7030		Transcription
		3280	Transcription
7707			Transcription
2034			Transcription
9534			Transcription
	5449		Transcription
	8431		Transcription
		2117	Transcription
154	121	113	Unique Genes
